# Supplementary material
Source: PubMed Central journal article supplement (PMC9215090)

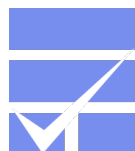

# CONSORT

TRANSPARENT REPORTING of TRIALS

## First E-Mail

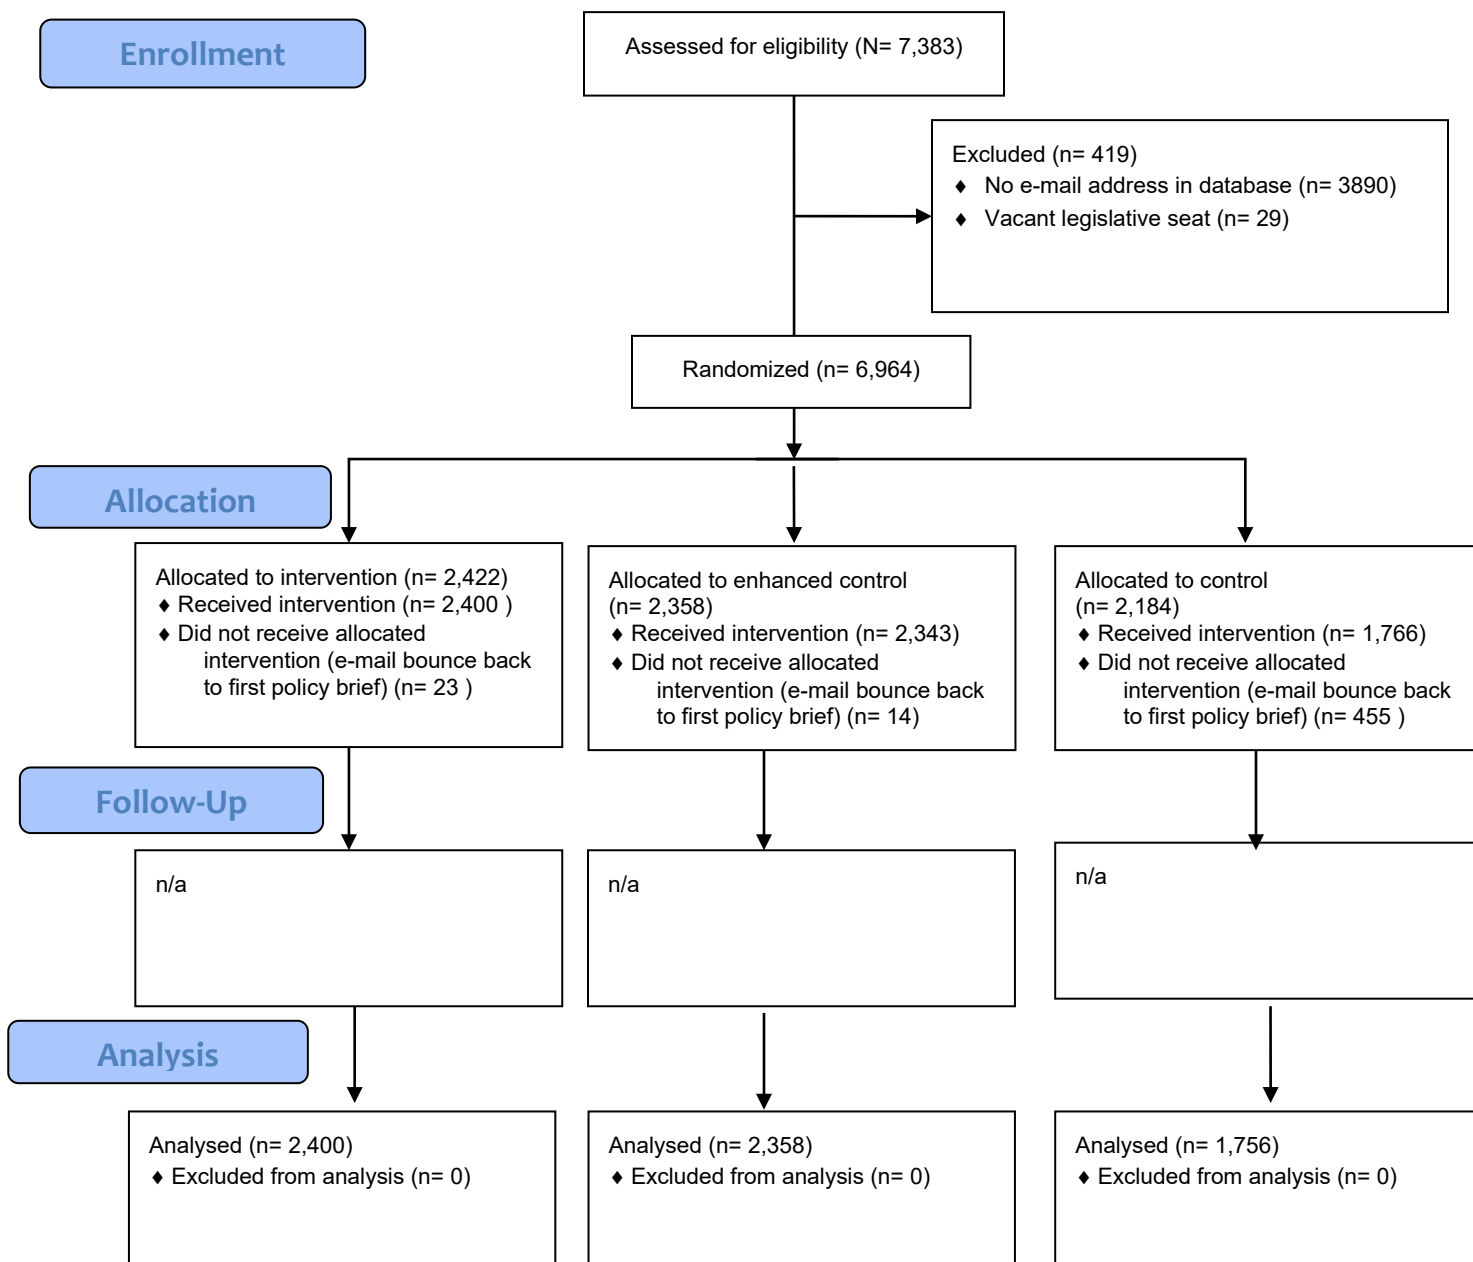

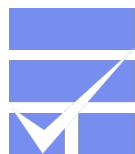

# CONSORT

TRANSPARENT REPORTING of TRIALS

## Second E-Mail

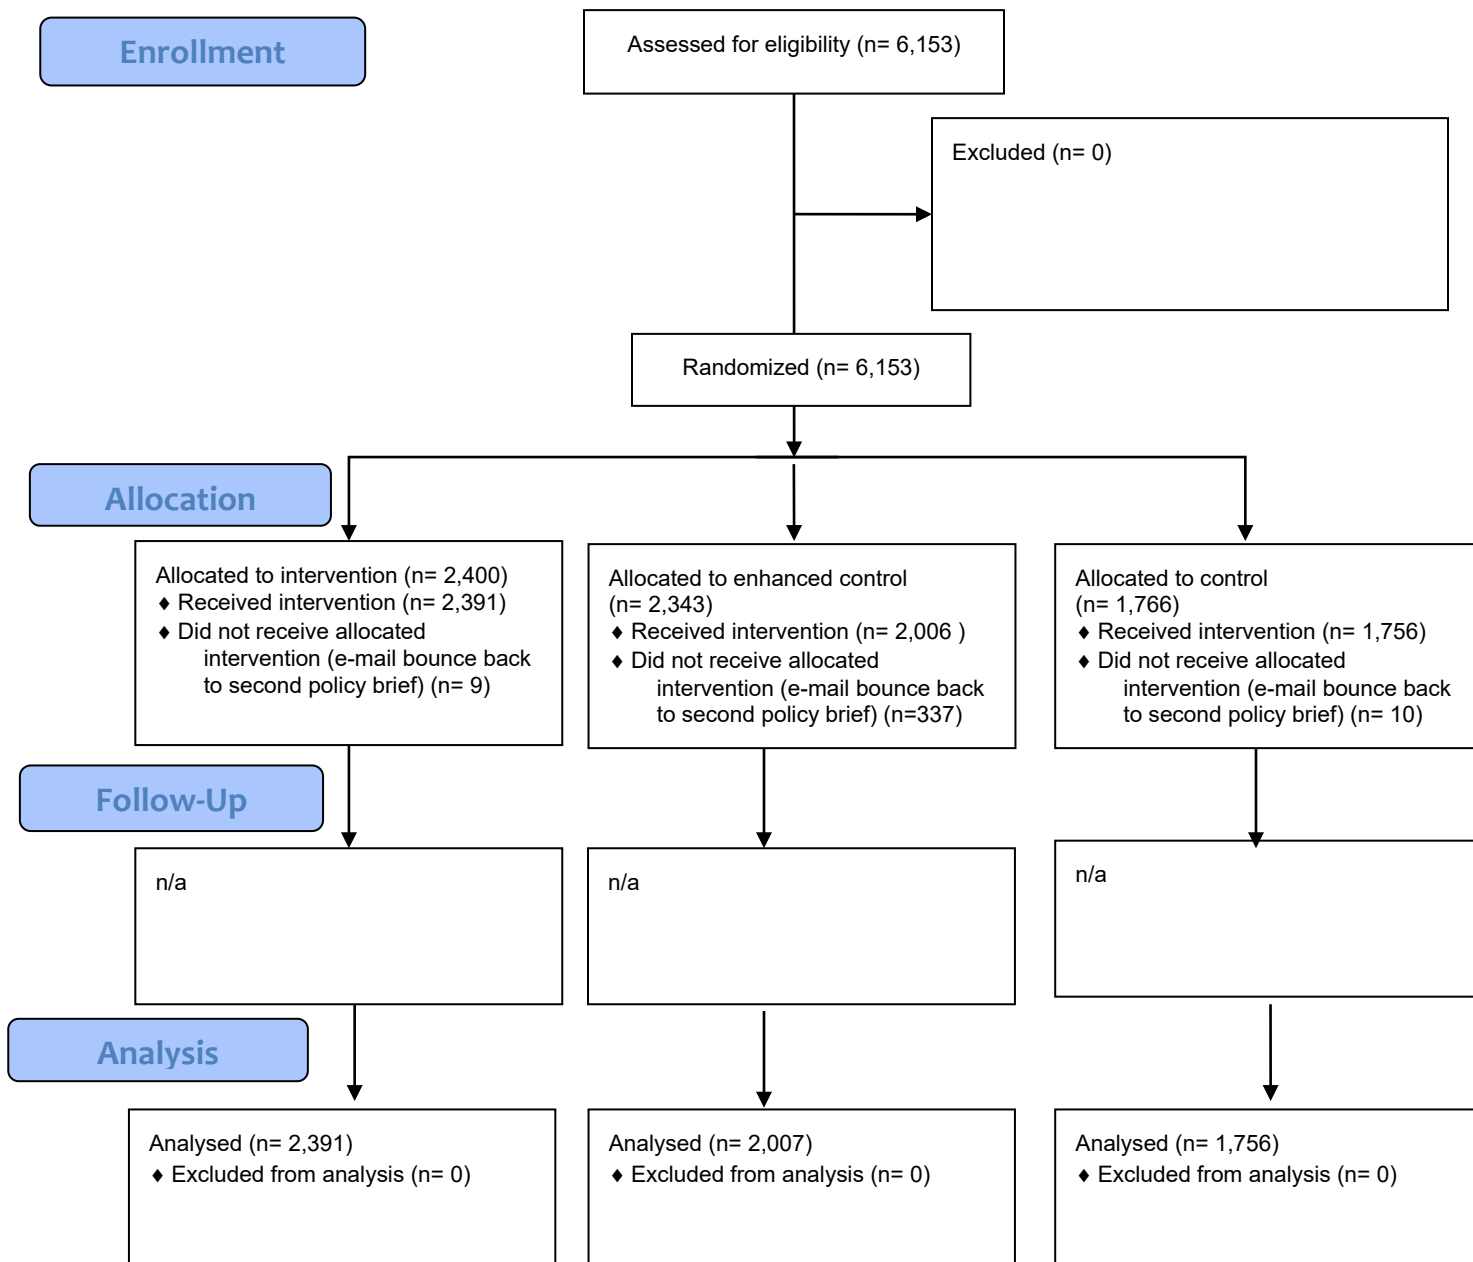

Supplement: 13012_2022_1214_MOESM2_ESM.pdf [file 13012_2022_1214_MOESM2_ESM.pdf]
